# Supplementary material for: Combining lime and organic amendments based on titratable alkalinity for efficient amelioration of acidic soils
Source: Copernicus journal article supplement (doi:10.5194/soil-10-33-2024), 2024-01-15
Supplement: Supplementary file 1 [file soil-10-33-2024-supplement.pdf]

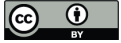

*Supplement of*

## **Combining lime and organic amendments based on titratable alkalinity for efficient amelioration of acidic soils**

**Birhanu Iticha et al.**

*Correspondence to:* Birhanu Iticha ([birhanuiticha.ayanssa@adelaide.edu.au](mailto:birhanuiticha.ayanssa@adelaide.edu.au))

The copyright of individual parts of the supplement might differ from the article licence.

**Table S1** Application rates of soil amendments calculated based on titratable alkalinity of the amendments and  $LBC_{eq}$  of the soil. In the lime + organic amendment mixes, the organic amendment rate is 15 g  $kg^{-1}$  soil.

| Soil amendments                      | Respective application rates (g $kg^{-1}$ soil) |
|--------------------------------------|-------------------------------------------------|
| Unamended soil                       | -                                               |
| Lime                                 | 2.81                                            |
| Organic amendments                   |                                                 |
| Wheat straw                          | 471.1                                           |
| Faba bean straw                      | 127.8                                           |
| Blended poultry litter               | 31.2                                            |
| Biochar                              | 32.6                                            |
| Compost                              | 15.4                                            |
| 50:50% mixture of organic amendments |                                                 |
| Wheat straw + compost                | 235.6 + 7.7                                     |
| Faba bean straw + biochar            | 63.9 + 16.3                                     |
| Lime-organic amendment combinations  |                                                 |
| Lime + wheat straw                   | 2.72 + 15                                       |
| Lime + faba bean straw               | 2.49 + 15                                       |
| Lime + blended poultry litter        | 1.49 + 15                                       |
| Lime + biochar                       | 1.54 + 15                                       |
| Lime + compost                       | 0.13 + 15                                       |

The liming value of 15 g of each organic amendment is presented in Table 3.

**Table S2.** Correlation matrix between pH<sub>w</sub> of amended soils measured at different soil water contents and basic chemical properties of the amendments.

|                   | pH of<br>OA | EC of<br>OA | Alkalinity | Soil pH<br>(60% FC) | Soil pH<br>(100% FC) | Soil pH<br>(150% FC) |
|-------------------|-------------|-------------|------------|---------------------|----------------------|----------------------|
| pH of OA          | 1           |             |            |                     |                      |                      |
| EC of OA          | -0.09       | 1           |            |                     |                      |                      |
| Alkalinity        | 0.60*       | 0.69**      | 1          |                     |                      |                      |
| Soil pH (60% FC)  | -0.44       | -0.43       | 0.72**     | 1                   |                      |                      |
| Soil pH (100% FC) | -0.45       | -0.48       | 0.75**     | 0.99**              | 1                    |                      |
| Soil pH (150% FC) | 0.90**      | 0.22        | 0.82**     | 0.77**              | 0.78**               | 1                    |

\* Correlation is significant at 0.05 level, \*\* Correlation is significant at 0.01 level of significance, OA: organic amendment, EC: electrical conductivity
